# Supplementary material for: Identification of novel furo[2,3-d]pyrimidine based chalcones as potent anti-breast cancer agents: synthesis, in vitro and in vivo biological evaluation
Source: PubMed Central journal article supplement (PMC8982411; doi:10.1039/d2ra00889k), 2022-03-15

## Identification of novel furo[2,3-*d*]pyrimidine based chalcones as potent anti-breast cancer agents: synthesis, *in vitro* and *in vivo* biological evaluation

### Results and Discussion

**Table 1: NCI 60 cancer cell lines cell growth percentage exhibited by some of the investigated final compounds (5a-k)**

| Panel/<br>Cell line                       | Cell Growth Percent for the tested compounds |        |        |        |        |        |        |        |        |        |        |
|-------------------------------------------|----------------------------------------------|--------|--------|--------|--------|--------|--------|--------|--------|--------|--------|
|                                           | 5a                                           | 5b     | 5c     | 5d     | 5e     | 5f     | 5g     | 5h     | 5i     | 5j     | 5k     |
| <b>Leukemia</b>                           |                                              |        |        |        |        |        |        |        |        |        |        |
| CCRF-CEM                                  | NA                                           | NA     | NA     | NA     | 6.65   | NA     | 104.43 | NA     | NA     | 56.73  | 34.04  |
| HL-60(TB)                                 | 99.24                                        | 79.95  | 57.06  | -47.76 | -4.98  | 63.95  | 82.21  | 7.83   | 116.51 | 73.98  | 65.94  |
| K-562                                     | 97.71                                        | 88.17  | 45.39  | -63.22 | 10.79  | 57.7   | 86.84  | 17.79  | 110.71 | 64.14  | 45.17  |
| MOLT-4                                    | 103.34                                       | 101.79 | 101.25 | 40.71  | 8.42   | 95.28  | 92.86  | 86.84  | 103.84 | 84.46  | 68.35  |
| RPMI-8226                                 | 118.62                                       | 104.52 | 73.78  | -14.13 | -3.59  | 72.24  | 97.8   | 28.4   | 121.96 | 77.23  | 61.89  |
| SR                                        | 113.77                                       | 65.79  | 57.18  | -30.62 | NA     | 41.43  | NA     | 32.97  | 125.99 | NA     | NA     |
| <b>Non-Small<br/>Cell Lung<br/>Cancer</b> |                                              |        |        |        |        |        |        |        |        |        |        |
| A549/ATCC                                 | 101.52                                       | 91.91  | 86.67  | 31.72  | 9.19   | 96.02  | 92.71  | 78.72  | 100.97 | 85.18  | 81.65  |
| EKVX                                      | 110.94                                       | 98.11  | 76.06  | 61.97  | 19.74  | 97.93  | 88.69  | 117.24 | 97.94  | 73.76  | 61.91  |
| HOP-62                                    | 93.41                                        | 109.97 | 96.6   | 6.15   | 12.07  | 96.56  | 105.98 | 92.59  | 93.95  | 106.51 | 101.35 |
| HOP-92                                    | 95.7                                         | 98.57  | 65.42  | -4.23  | -10.66 | 78.81  | 86.44  | 95.54  | 116.27 | 88.39  | 96.38  |
| NCI-H226                                  | 91.17                                        | 101.99 | 92.57  | 93.99  | -8.79  | 94.9   | 92.37  | 107.44 | 101.59 | 90.56  | 92.12  |
| NCI-H23                                   | 95.21                                        | 86.11  | 80.21  | 39.75  | -11.17 | 89.38  | 91.11  | 89.98  | 98.73  | 77.79  | 68.91  |
| NCI-H322M                                 | 98.81                                        | 92.1   | 89.29  | 45.25  | 2.39   | 89.1   | 97     | 92.37  | 98.28  | 83.01  | 85.84  |
| NCI-H460                                  | 101.9                                        | 95.6   | 89.62  | 21.01  | 3.92   | 97.83  | 104.09 | 93.4   | 103.46 | 94.94  | 83.68  |
| NCI-H522                                  | 97.84                                        | 84.69  | 69.65  | 17.51  | 13.9   | 81.1   | 93.66  | 39.06  | 100.66 | 70.94  | 47.66  |
| <b>Colon Cancer</b>                       |                                              |        |        |        |        |        |        |        |        |        |        |
| COLO 205                                  | 106.57                                       | 108.07 | 107.24 | 70.83  | 3.83   | 100.25 | 104.38 | 107.08 | 102    | 106.32 | 95.35  |
| HCC-2998                                  | 102.82                                       | 100.98 | 102.27 | 83.09  | -33.93 | 97.86  | 103.56 | 102.05 | 100.16 | 110.01 | 112.17 |

|                       |        |        |        |        |        |        |        |        |        |        |        |
|-----------------------|--------|--------|--------|--------|--------|--------|--------|--------|--------|--------|--------|
| HCT-116               | 100.99 | 79.34  | 59.2   | 13.73  | -11.63 | 82.67  | 99.98  | 36.35  | 102.26 | 71.21  | 61.28  |
| HCT-15                | 102.95 | 80.09  | 66.72  | 19.92  | -27.43 | 73.3   | 95.08  | 50.56  | 98.07  | 60.48  | 49.32  |
| HT29                  | 117.69 | 97.92  | 82.81  | 12.91  | 15.27  | 92.15  | 99.07  | 30.39  | 107.96 | 98.6   | 90.68  |
| KM12                  | 106.19 | 76.18  | 71.61  | 13.59  | -5.18  | 78.54  | 99.76  | 52.07  | 103.07 | 98.54  | 96.94  |
| SW-620                | 107.21 | 111.57 | 97.09  | 8.49   | 3.84   | 84.79  | 113.98 | 31.2   | 100.02 | 96.16  | 77.52  |
| <b>CNS Cancer</b>     |        |        |        |        |        |        |        |        |        |        |        |
| SF-268                | 102.68 | 89.07  | 89.14  | 50.11  | 5.39   | 93.94  | 97.26  | 94.61  | 99.57  | 82.2   | 81.29  |
| SF-295                | 105.39 | 102.88 | 101.59 | 77.03  | 14.15  | 102.91 | 96.07  | 104    | 99.26  | 104.9  | 103.99 |
| SF-539                | 100.98 | 97.94  | 95.75  | 14.53  | -9.63  | 91.11  | 94.78  | 93.33  | 97.53  | 96.48  | 95.74  |
| SNB-19                | 96.94  | 96.28  | 85     | 42.01  | 23.47  | 87.15  | 95.56  | 83.98  | 97.26  | 90.78  | 93.63  |
| SNB-75                | 71.45  | 84.33  | 39.85  | -11.42 | -2.44  | 69.9   | 100.92 | 44.61  | 84.37  | 69.52  | 77.97  |
| U251                  | 104.27 | 96.29  | 85.84  | 24.28  | 12.05  | 88.4   | 90.54  | 85.08  | 103.44 | NA     | NA     |
| <b>Melanoma</b>       |        |        |        |        |        |        |        |        |        |        |        |
| LOX IMVI              | 91.96  | 87.72  | 68.87  | 8.44   | -90.64 | 70.43  | 98.25  | 52.24  | 97.73  | 80.09  | 66.16  |
| MALME-3M              | 97.71  | 95.59  | 80.74  | 71.03  | 24.45  | 91.63  | 95.31  | 99.64  | 103.06 | 82.35  | 88.07  |
| M14                   | 97.52  | 95.42  | 93.77  | 82.29  | 15.37  | 83.51  | 99.94  | 93.89  | 99.58  | 76.8   | 75.33  |
| MDA-MB-435            | 99.76  | 88.6   | 72.4   | 6.74   | 19.77  | 88.45  | 100.44 | 57.17  | 102.31 | 77.9   | 74.4   |
| SK-MEL-2              | 108.01 | 92.56  | 87.27  | 55.75  | 11.95  | 101.38 | 95.11  | 91.28  | 109.13 | 83.55  | 82.53  |
| SK-MEL-28             | 106.33 | 100.04 | 91.71  | 39.38  | 23.88  | 95.88  | 95.83  | 89.07  | 101.05 | 94.98  | 93.9   |
| SK-MEL-5              | 96.47  | 88.92  | 71.45  | 37.48  | 8.55   | 93.61  | 96.43  | 81.65  | 101.44 | 89.3   | 89.88  |
| UACC-257              | NA     | NA     | NA     | NA     | 32.71  | NA     | 95.02  | NA     | 96.57  | 71.89  | 73.05  |
| UACC-62               | 94.43  | 83.8   | 71.29  | 18.18  | 13.91  | 80.95  | 89.01  | 53.5   | 96.5   | 77.66  | 86.97  |
| <b>Ovarian Cancer</b> |        |        |        |        |        |        |        |        |        |        |        |
| IGROV1                | 86.12  | 96.84  | 71     | 38.93  | 8.79   | 82.79  | 96.95  | 89.22  | 100.42 | 81.08  | 75.38  |
| OVCAR-3               | 106.18 | 97.66  | 75.24  | 4.32   | -10.86 | 82.06  | 101.83 | 48.57  | 107.76 | 98.1   | 77.82  |
| OVCAR-4               | 98.18  | 88.87  | 79.06  | 29.78  | 35.99  | 88.75  | 114.31 | 68.6   | 101.05 | 86.57  | 74.95  |
| OVCAR-5               | 109.42 | 119.58 | 124.69 | 34.53  | 22.34  | 103.4  | 94.86  | 133.71 | 96.48  | 100.39 | 96.5   |
| OVCAR-8               | 97.57  | 91.14  | 71.1   | 15.79  | 7.33   | 87.14  | 98.99  | 45.43  | 103.38 | 87.33  | 79.48  |
| NCI/ADR-RES           | 99.23  | 94.87  | 69.73  | 10.43  | -30.5  | 79.13  | 104.12 | 42.98  | 100.64 | 89.65  | 82.13  |
| SK-OV-3               | 100.5  | NA     | 95.45  | NA     | 31.47  | NA     | 105.55 | NA     | 102.67 | 102.11 | 98.66  |
| <b>Renal Cancer</b>   |        |        |        |        |        |        |        |        |        |        |        |

|                        |        |        |        |              |             |        |        |        |        |        |        |
|------------------------|--------|--------|--------|--------------|-------------|--------|--------|--------|--------|--------|--------|
| 786-0                  | 102.7  | 100.01 | 97.12  | 29.69        | 11.46       | 90.85  | 98.23  | 83.77  | 101.52 | 98.31  | 94.25  |
| A498                   | 106.22 | 105.35 | 94.26  | 62.41        | 23.74       | 90.75  | 94.74  | 94.3   | 94.79  | 82.93  | 93.43  |
| ACHN                   | 98.33  | 90.52  | 66.95  | 27.18        | 1.43        | 82.24  | 103.7  | 66.41  | 101.26 | 87.53  | 74.68  |
| CAKI-1                 | 86.24  | 75.72  | 49.46  | 26.06        | 28.45       | 50.18  | 96.49  | 46.13  | 87.15  | 84.27  | 72.7   |
| RXF 393                | NA     | NA     | NA     | NA           | 4.34        | NA     | 100.38 | NA     |        | 88.54  | 66.26  |
| SN12C                  | 99.51  | 92.43  | 82.62  | 25.41        | 1.76        | 86.6   | 101.17 | 67.03  | 97.24  | 87.53  | 79.84  |
| TK-10                  | 178.11 | 143.95 | 132.38 | 32.29        | 40.89       | 119.78 | 98.41  | 123.43 | 135    | 160.57 | 150.85 |
| UO-31                  | 75.33  | 88.53  | 61.89  | 37.95        | 19.36       | 64.2   | 87.3   | 67.58  | 84.29  | 67.29  | 63.17  |
| <b>Prostate Cancer</b> |        |        |        |              |             |        |        |        |        |        |        |
| PC-3                   | 100.78 | 96.64  | 76.25  | 34.23        | 25.46       | 90.62  | 101.04 | 59.15  | 102.54 | 86.77  | 83.44  |
| DU-145                 | 104.96 | 86.71  | 66.58  | 6.76         | 5.67        | 80.29  | 103.23 | 78.22  | 115.94 | 81.19  | 64.83  |
| <b>Breast Cancer</b>   |        |        |        |              |             |        |        |        |        |        |        |
| MCF7                   | 83.98  | 69.42  | 33.9   | 15.37        | 9.43        | 61.04  | 83.93  | 38.96  | 90.21  | 60.51  | 47.89  |
| MDA-MB-231/ATCC        | 90.91  | 97.31  | 80.04  | 22.35        | 16.1        | 95.53  | 102.11 | 89.02  | 106.43 | 92.23  | 86.67  |
| HS 578T                | 96.44  | 101.93 | 96.2   | 60.55        | 24.3        | 106.62 | 102.67 | 101.89 | 93.01  | 93.49  | 84.32  |
| BT-549                 | 100.6  | 99.36  | 88.71  | 20.23        | 2.55        | 95.3   | 92     | 73.75  | 100.21 | 84.7   | 72.6   |
| T-47D                  | NA     | NA     | NA     | NA           | 4.69        | NA     | 102.73 | NA     | NA     | 71.98  | 58.91  |
| MDA-MB-468             | 102.11 | 91.64  | 18.16  | 10.59        | -55.38      | 81.37  | 91.23  | 86.73  | 113.44 | 70.98  | 64.34  |
| <b>MEAN % Growth</b>   | 101.09 | 94.21  | 79.16  | <b>26.93</b> | <b>5.49</b> | 85.81  | 97.43  | 73.07  | 102.26 | 86.06  | 79.38  |

**Table 2: GI50 values of compounds 5d and 5e against 59 NCI cell line**

| Panel/ Cell line | GI50 ( $\mu\text{M}$ ) |             |
|------------------|------------------------|-------------|
|                  | Compound 5d            | Compound 5e |
| Leukemia         |                        |             |
| CCRF-CEM         | 1.81                   | 1.01        |
| HL-60(TB)        | 2.63                   | 2.32        |
| K-562            | 1.82                   | 0.798       |
| MOLT-4           | 2.75                   | 2.84        |
| RPMI-8226        | 1.66                   | 1.36        |

|                            |       |      |
|----------------------------|-------|------|
| SR                         | 1.51  | 1.35 |
| Non-Small Cell Lung Cancer |       |      |
| A549/ATCC                  | 2.66  | 2.73 |
| EKVX                       | 2.37  | 2.37 |
| HOP-62                     | 2.83  | 2.62 |
| HOP-92                     | 1.47  | 1.35 |
| NCI-H226                   | 1.96  | 2.48 |
| NCI-H23                    | 2.51  | 2.07 |
| NCI-H322M                  | 2.32  | 2.39 |
| NCI-H460                   | 2.56  | 3.25 |
| NCI-H522                   | 1.79  | 1.89 |
| Colon Cancer               |       |      |
| COLO 205                   | 1.9   | 1.7  |
| HCC-2998                   | 1.79  | 1.7  |
| HCT-116                    | 1.59  | 1.26 |
| HCT-15                     | 1.29  | 1.09 |
| HT29                       | 2.9   | 2.36 |
| KM12                       | 2.97  | 1.51 |
| SW-620                     | 2.53  | 2.16 |
| CNS Cancer                 |       |      |
| SF-268                     | 3.17  | 3.08 |
| SF-295                     | 4.5   | 4.22 |
| SF-539                     | 2.37  | 1.73 |
| SNB-19                     | 3.28  | 1.8  |
| SNB-75                     | ----- | 1.23 |
| U251                       | 1.97  | 1.44 |
| Melanoma                   |       |      |
| LOX IMVI                   | 1.6   | 1.03 |
| MALME-3M                   | 2.13  | 1.89 |
| M14                        | 1.96  | 2.14 |
| MDA-MB-435                 | 2.4   | 2.00 |
| SK-MEL-2                   | 3.13  | 2.34 |
| SK-MEL-28                  | 2.51  | 2.39 |
| SK-MEL-5                   | 2.25  | 1.56 |
| UACC-257                   | 2.72  | 2.73 |
| UACC-62                    | 1.64  | 1.33 |
| Ovarian Cancer             |       |      |
| IGROV1                     | 1.82  | 1.81 |
| OVCAR-3                    | 2.3   | 1.85 |

|                  |             |             |
|------------------|-------------|-------------|
| OVCAR-4          | 4.43        | 2.51        |
| OVCAR-5          | 3.17        | 2.93        |
| OVCAR-8          | 2.67        | 2.08        |
| NCI/ADR-RES      | 2.44        | 1.84        |
| SK-OV-3          | 3.09        | 4.08        |
| Renal Cancer     |             |             |
| 786-0            | 3.02        | 1.8         |
| A498             | 1.48        | 2.46        |
| ACHN             | 1.99        | 1.6         |
| CAKI-1           | 3.06        | 1.34        |
| RXF 393          | 1.97        | 1.41        |
| SN12C            | 2.79        | 2.95        |
| TK-10            | 5.09        | 4.46        |
| UO-31            | 1.09        | 0.781       |
| Prostate Cancer  |             |             |
| PC-3             | 2.49        | 2.36        |
| DU-145           | 2.82        | 2.03        |
| Breast Cancer    |             |             |
| MCF7             | 1.39        | 0.505       |
| MDA-MB-231/ATCC  | 2.65        | 3.47        |
| HS 578T          | 3.66        | 3.49        |
| BT-549           | 2.24        | 1.74        |
| T-47D            | 1.72        | 1.86        |
| MDA-MB-468       | 1.38        | -----       |
| <b>Mean GI50</b> | <b>2.41</b> | <b>1.23</b> |

# Five doses Curves

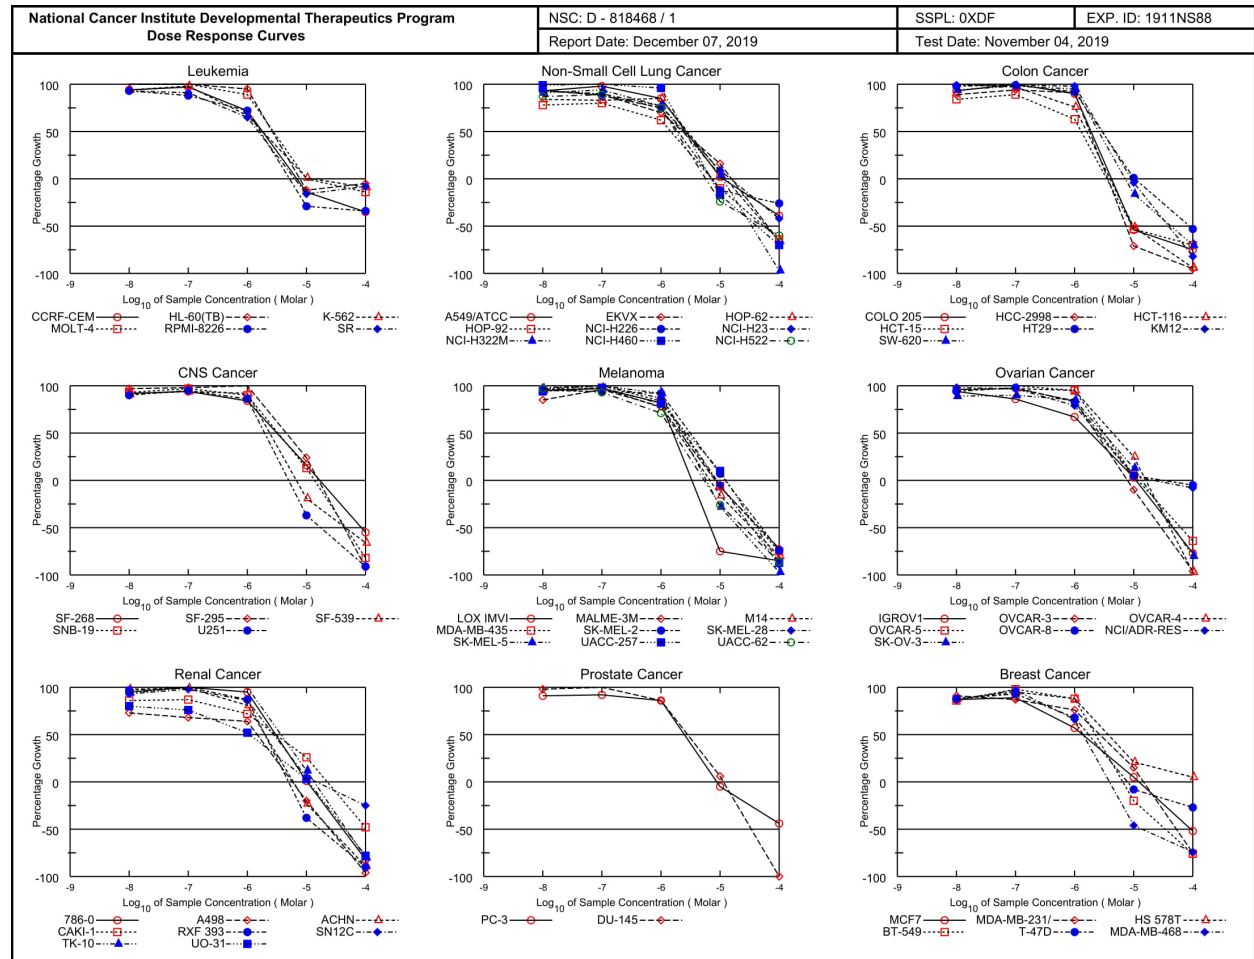

**Figure 1: Dose response curve for compound 5d in 9 Cell panels (Leukemia, Melanoma, NSLC, Colon, CNS, Ovarian, renal, prostate and breast cancers)**

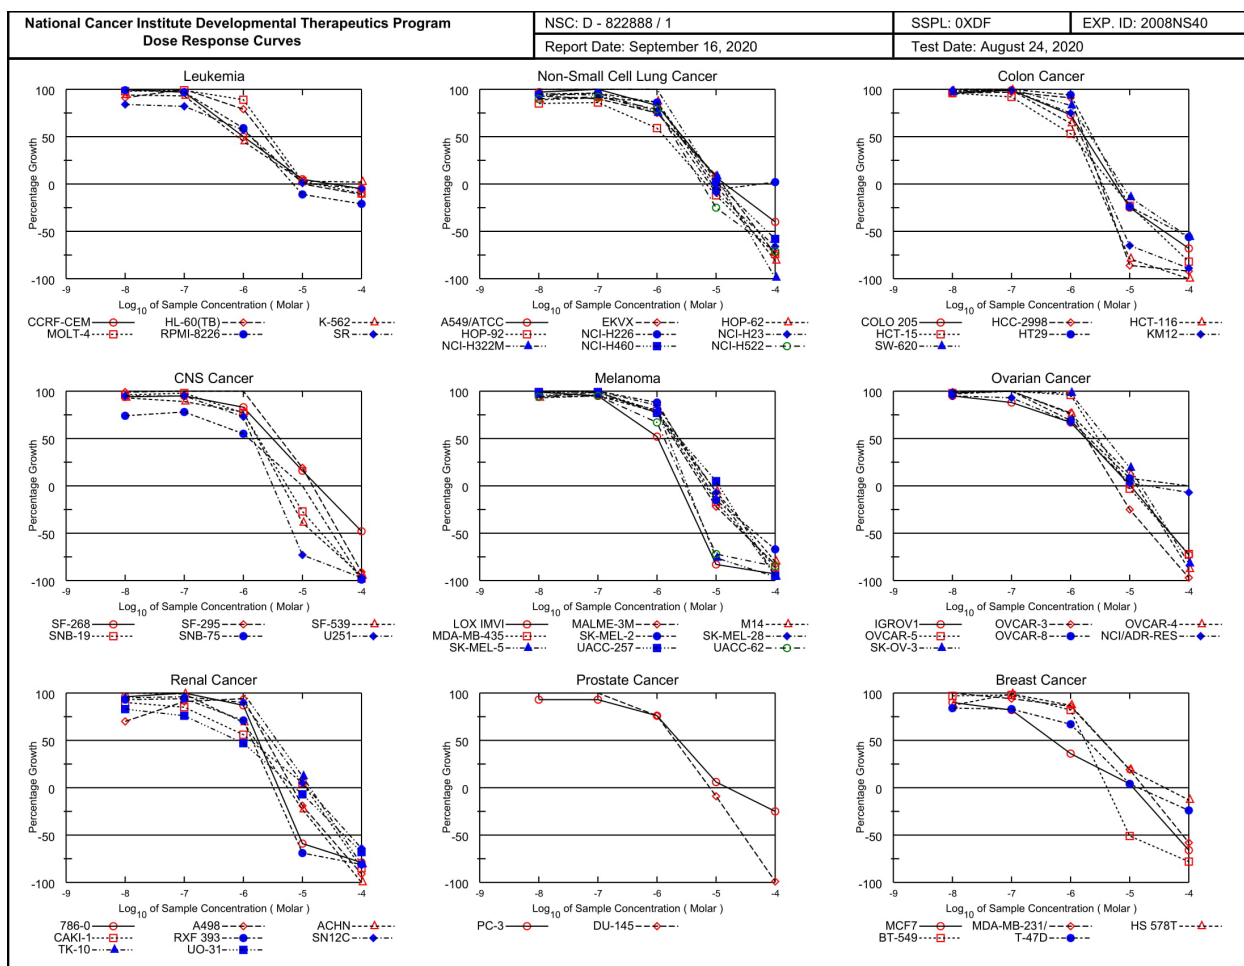

Figure 2: Dose response curve for compound 5e in 9 Cell panels (Leukemia, Melanoma, NSLC, Colon, CNS, Ovarian, renal, prostate and breast cancers)

## Experimental Chemistry and analysis

## Supplementary Data NMR charts

. 5-Acetyl-6-methylfuro[2,3-d]pyrimidin-4(3H)-one (4)

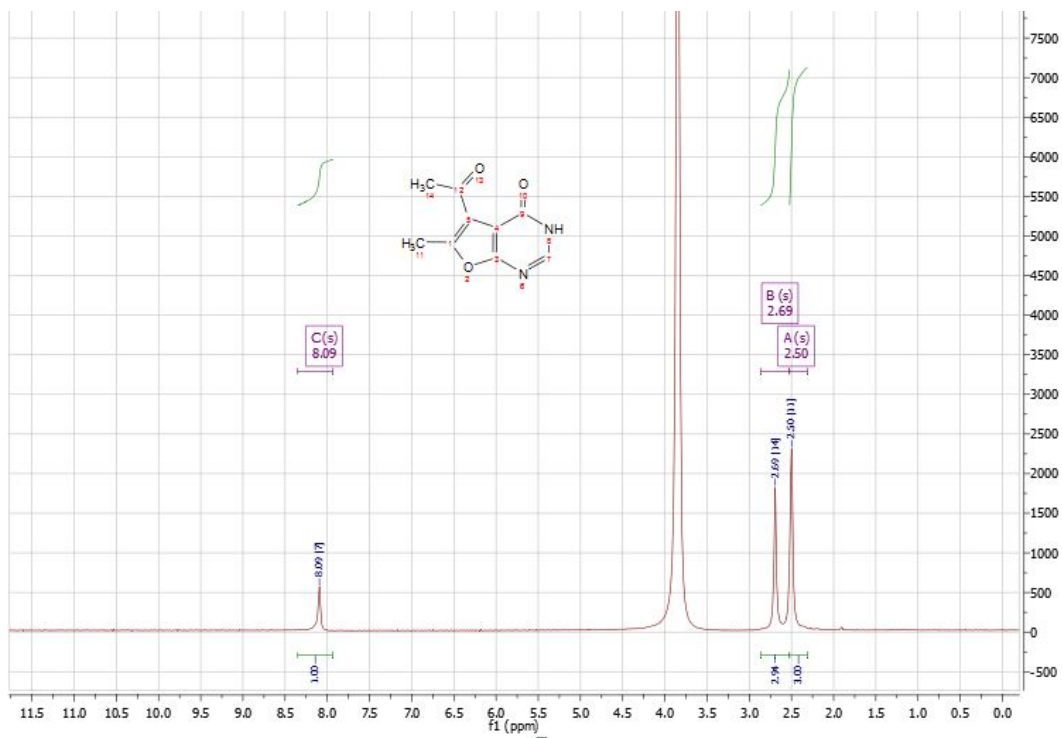

5-Cinnamoyl-6-methylfuro[2,3-d]pyrimidin-4(3H)-one (5a)

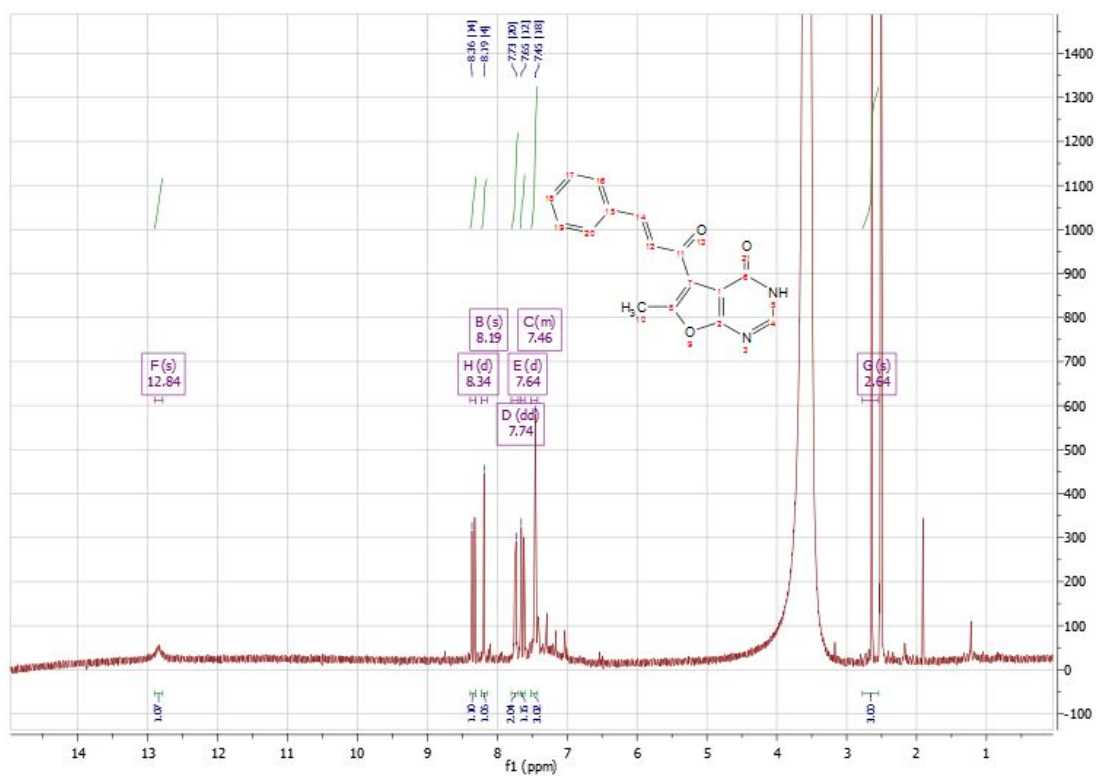



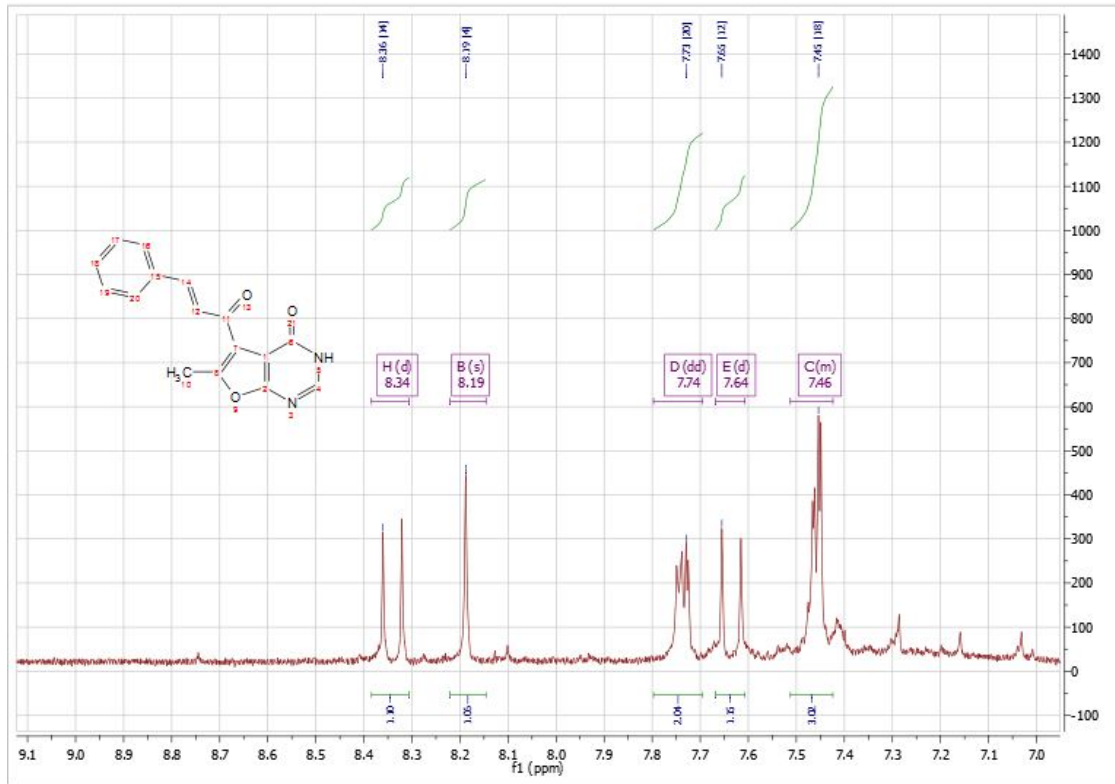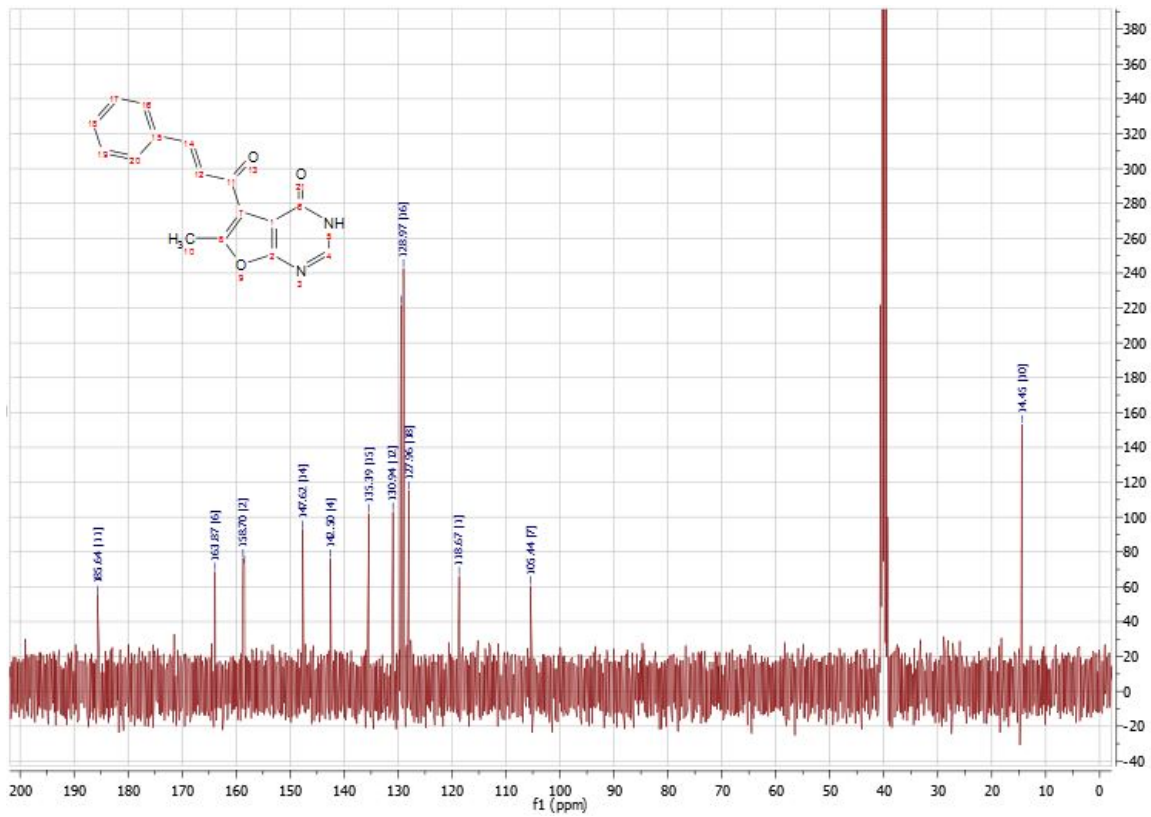

**(E)-5-(3-(4-methoxyphenyl)acryloyl)-6-methylfuro[2,3-d]pyrimidin-4(3H)-one (5b)**

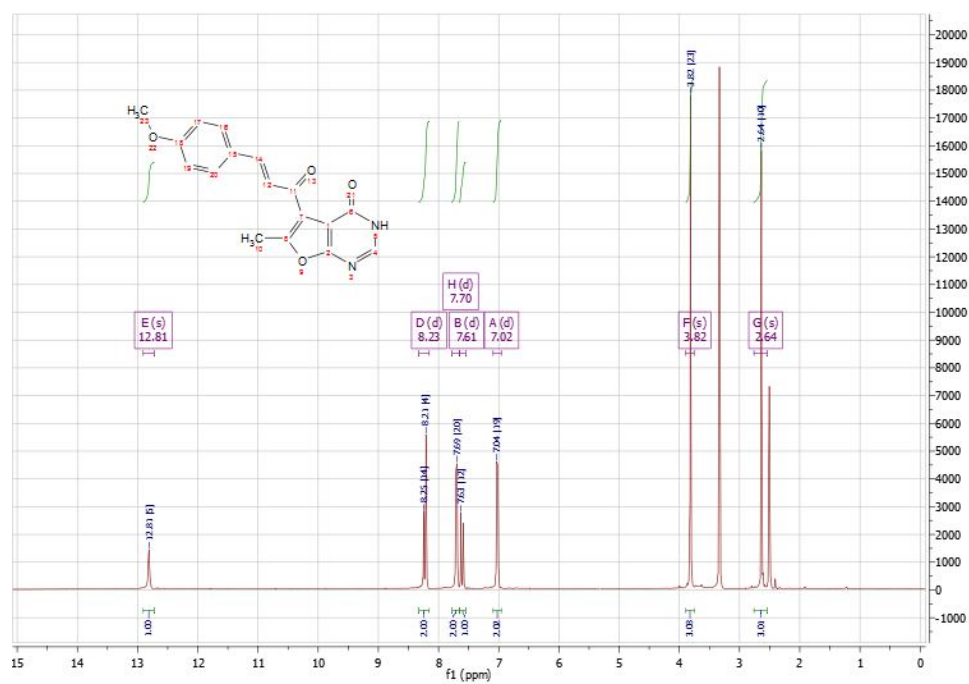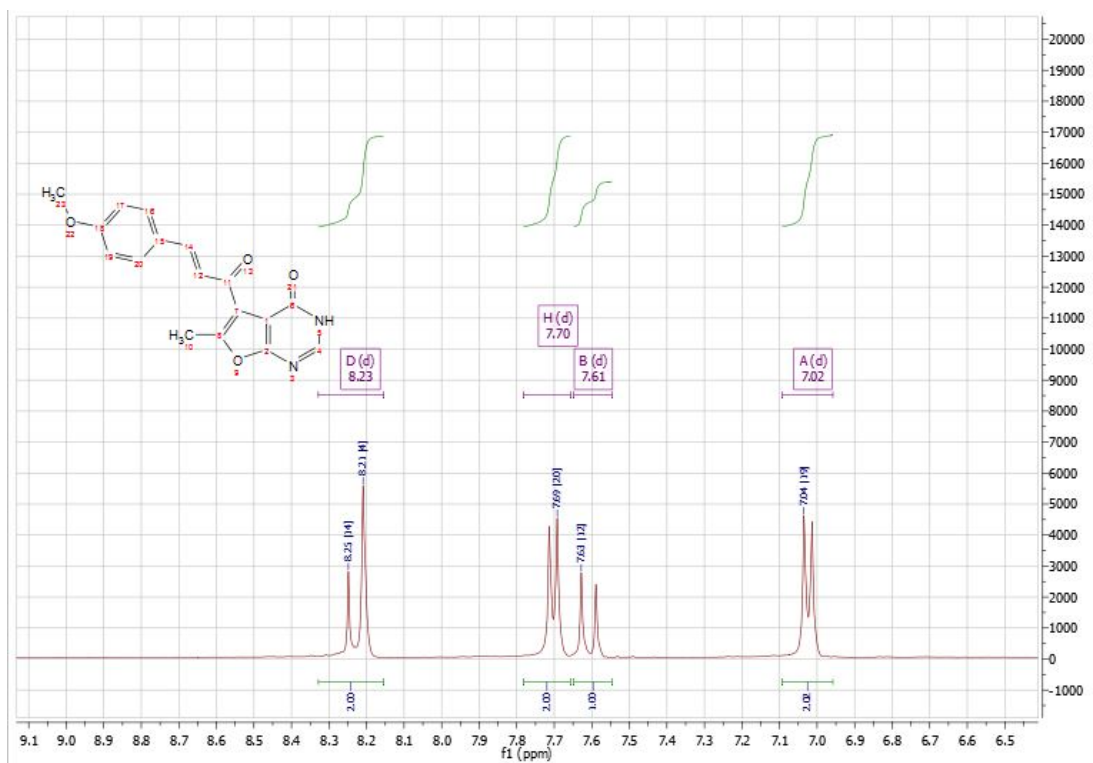

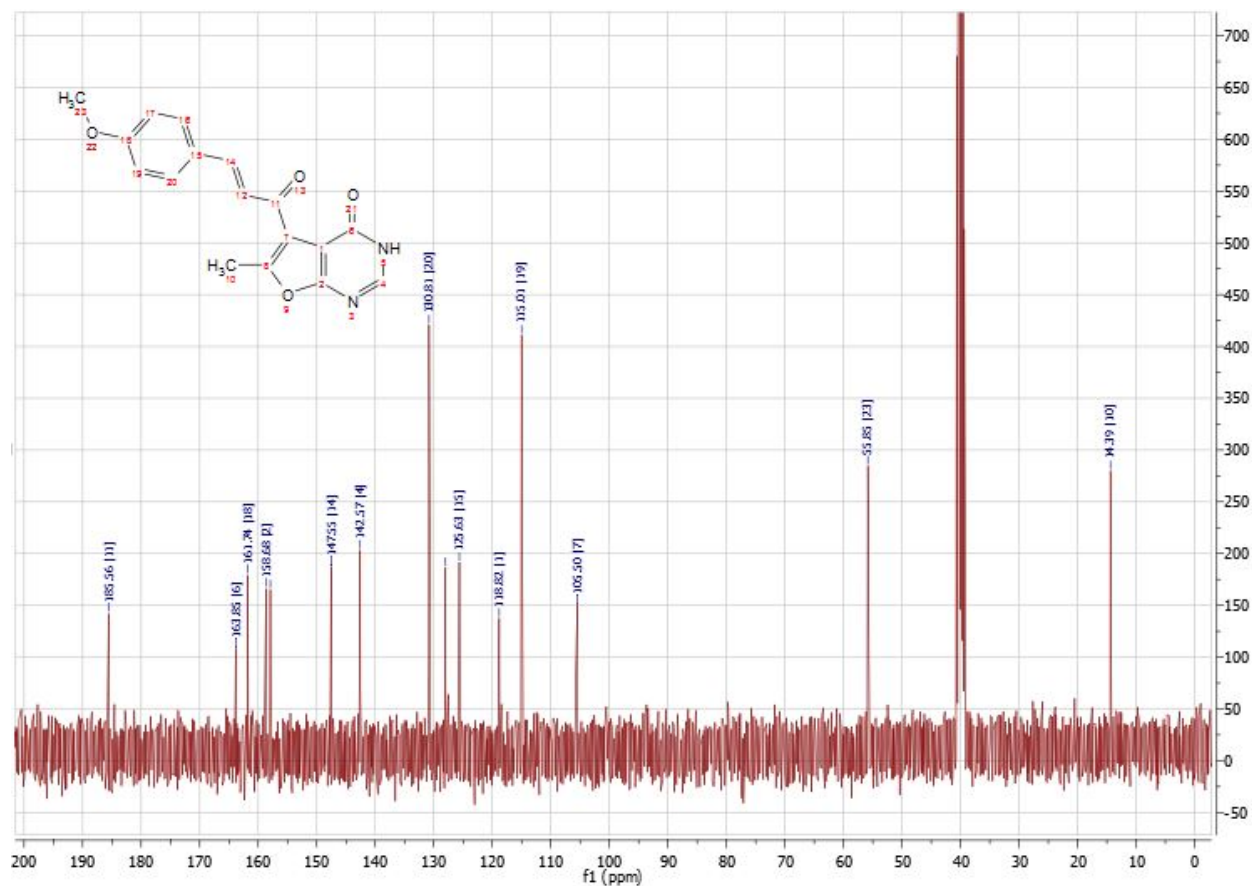

(E)-5-(3-(4-florophenyl)acryloyl)-6-methylfuro[2,3-d]pyrimidin-4(3H)-one (5c)

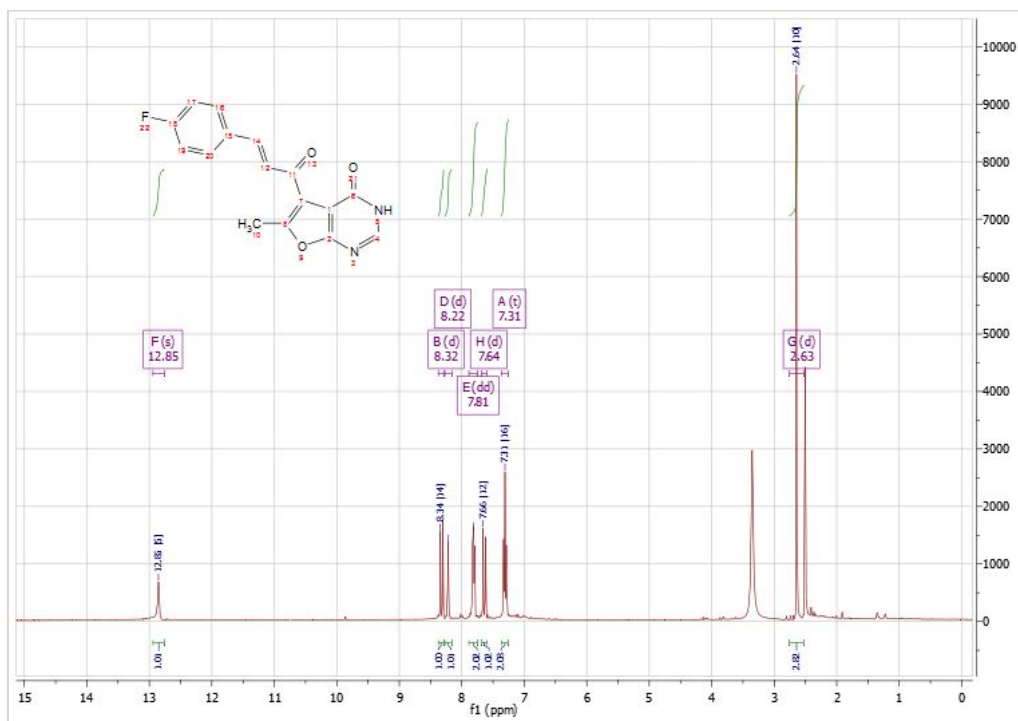

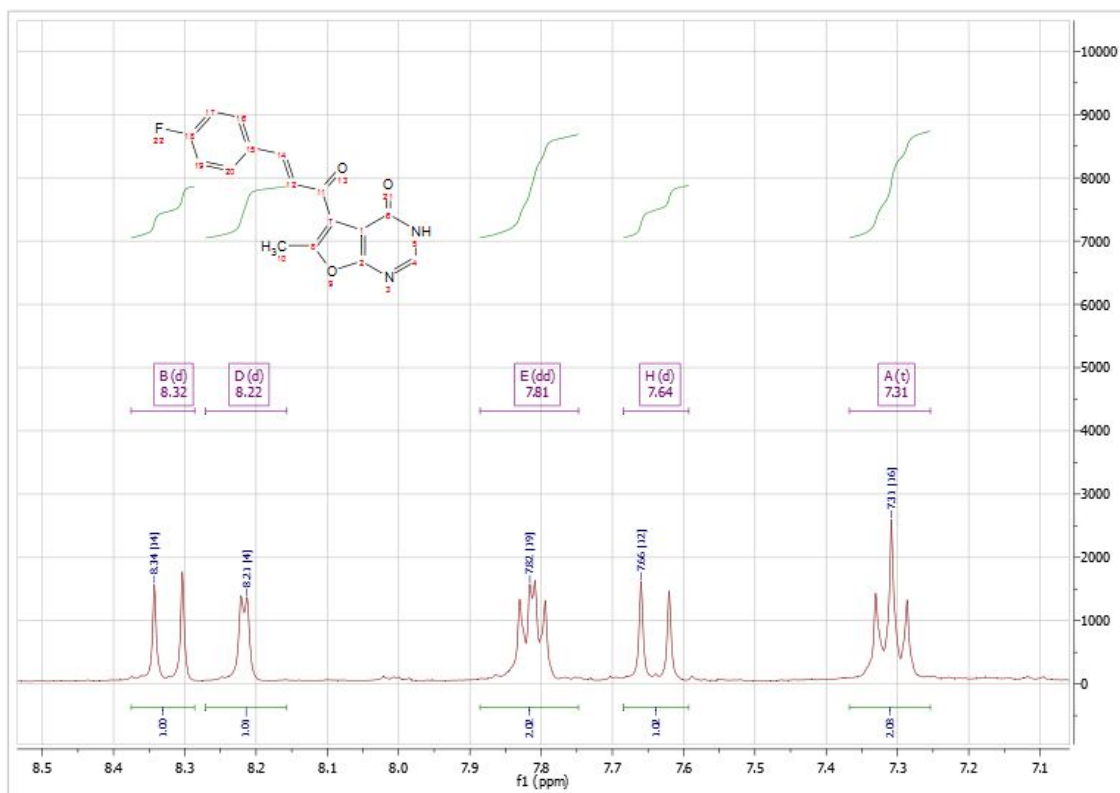

**(E)-5-(3-(4-chlorophenyl)acryloyl)-6-methylfuro[2,3-d]pyrimidin-4(3H)-one (5d)**

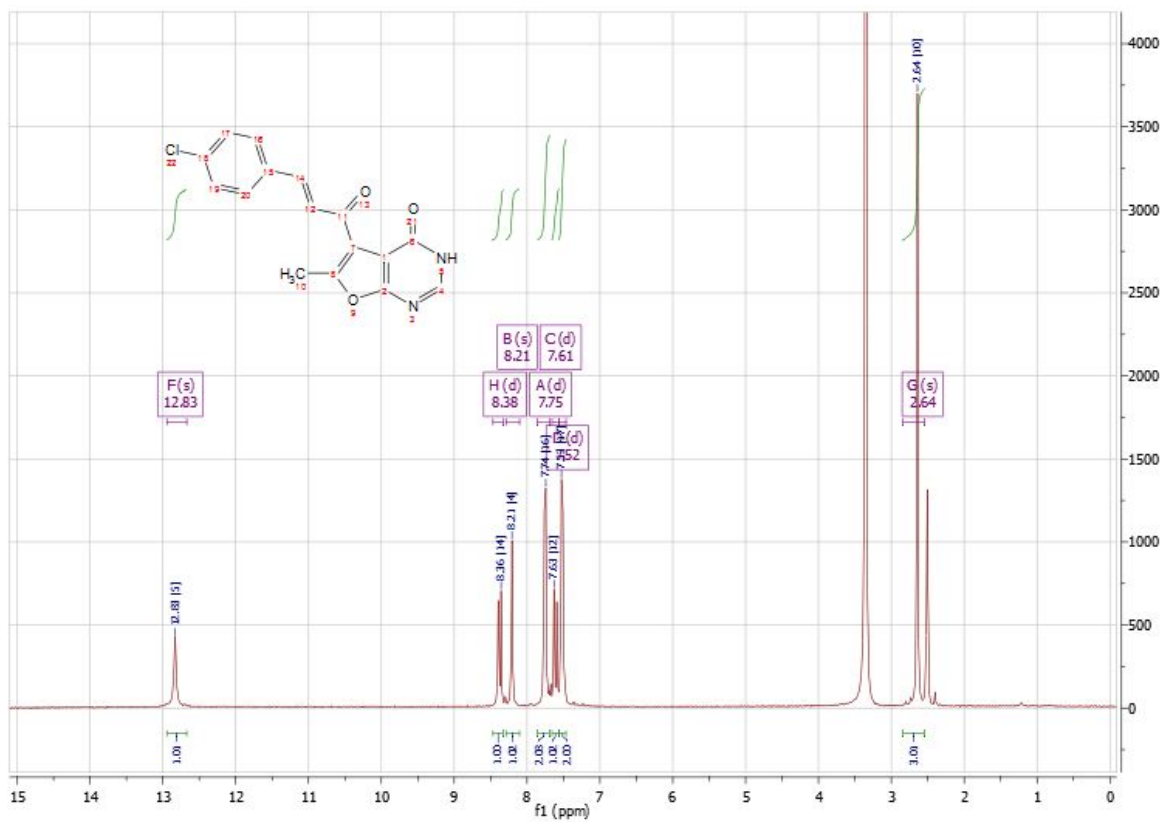

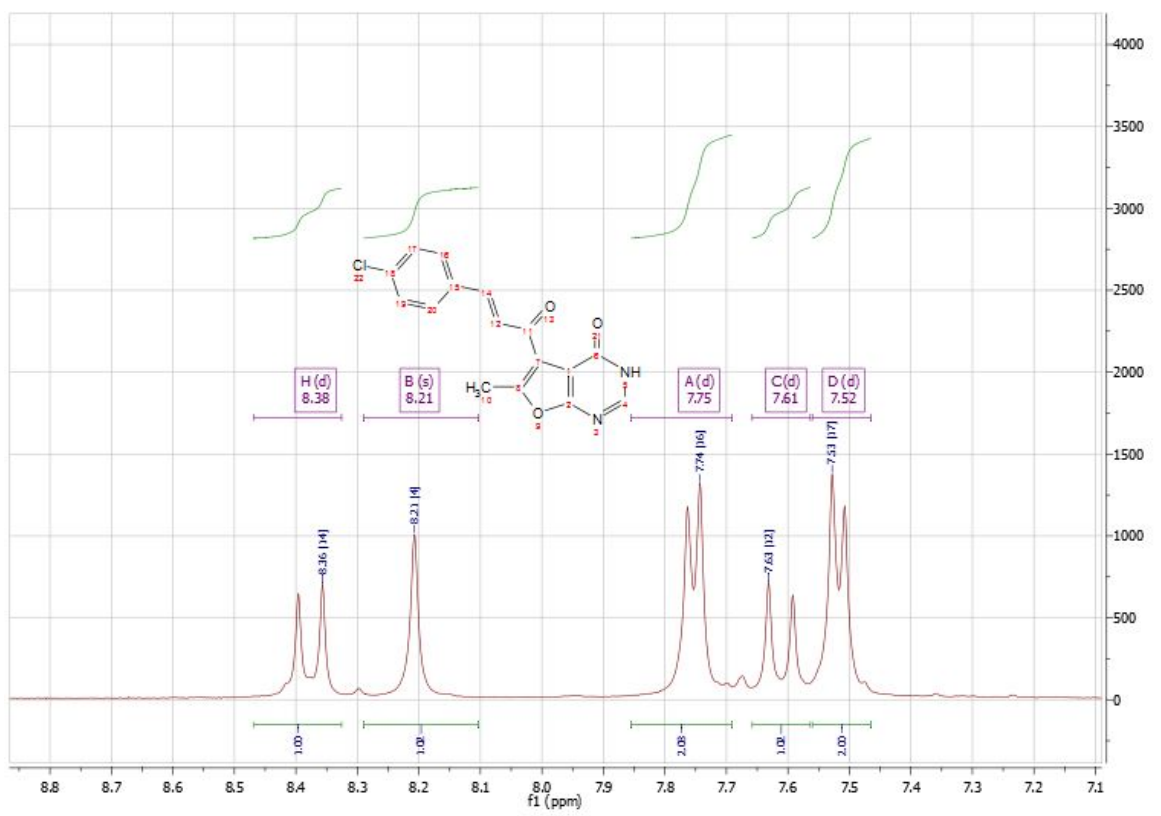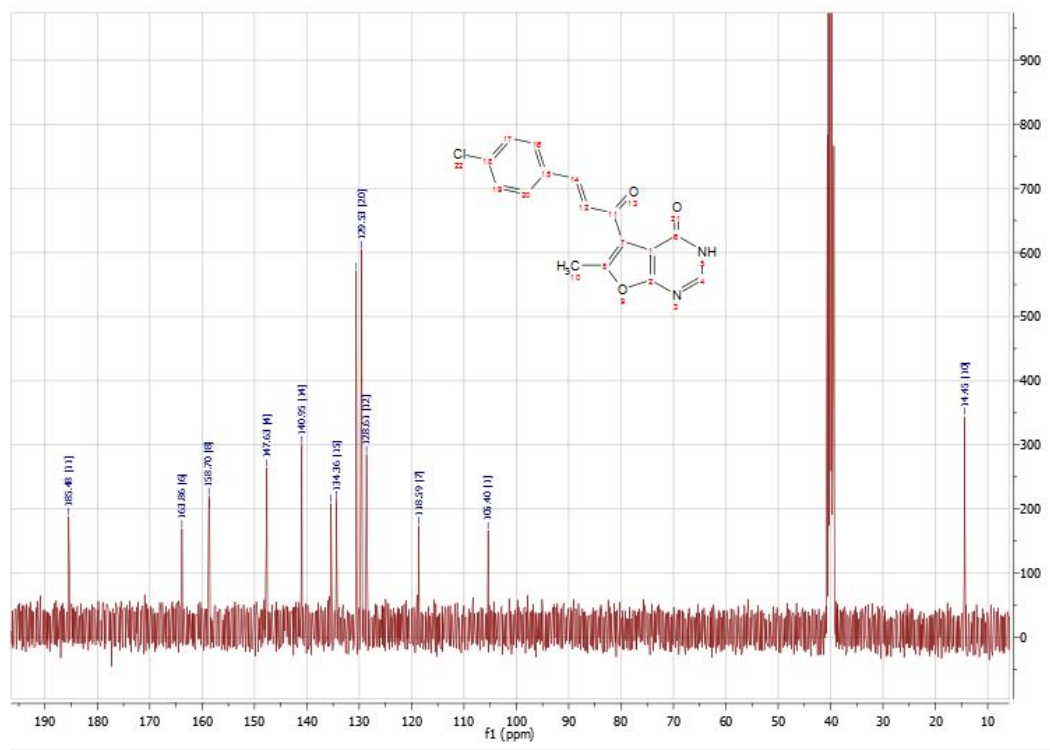

(E)-5-(3-(4-Bromophenyl)acryloyl)-6-methylfuro[2,3-d]pyrimidin-4(3H)-one. (5e)

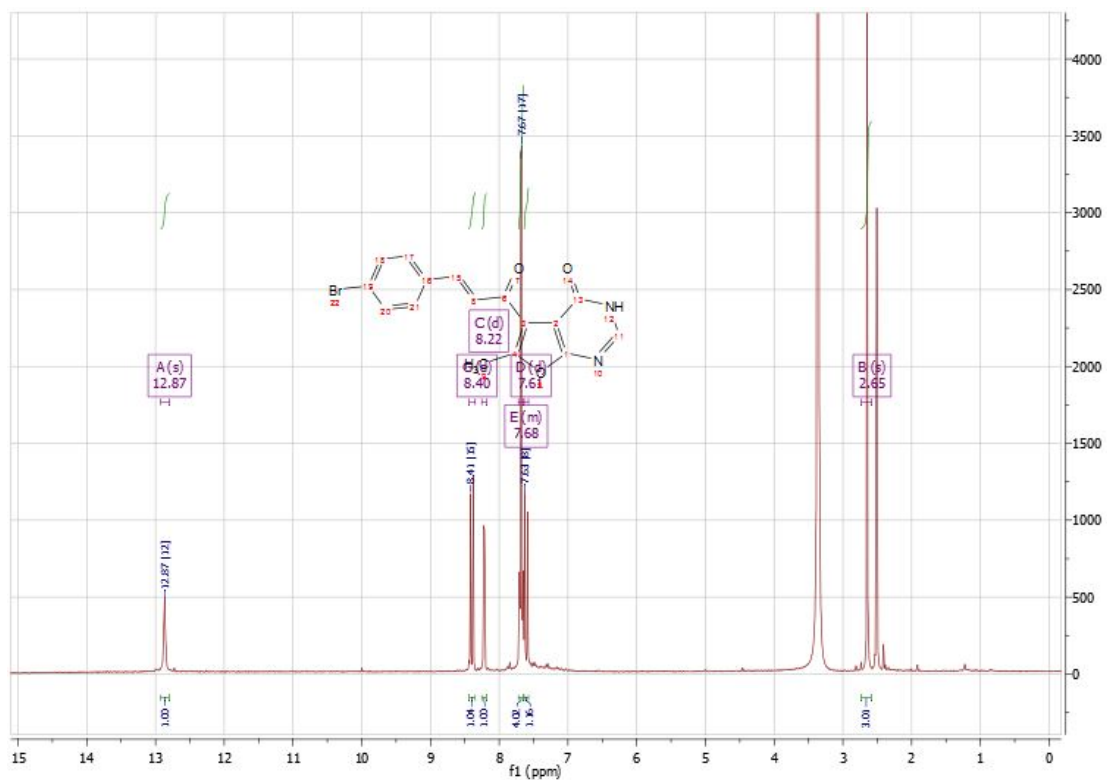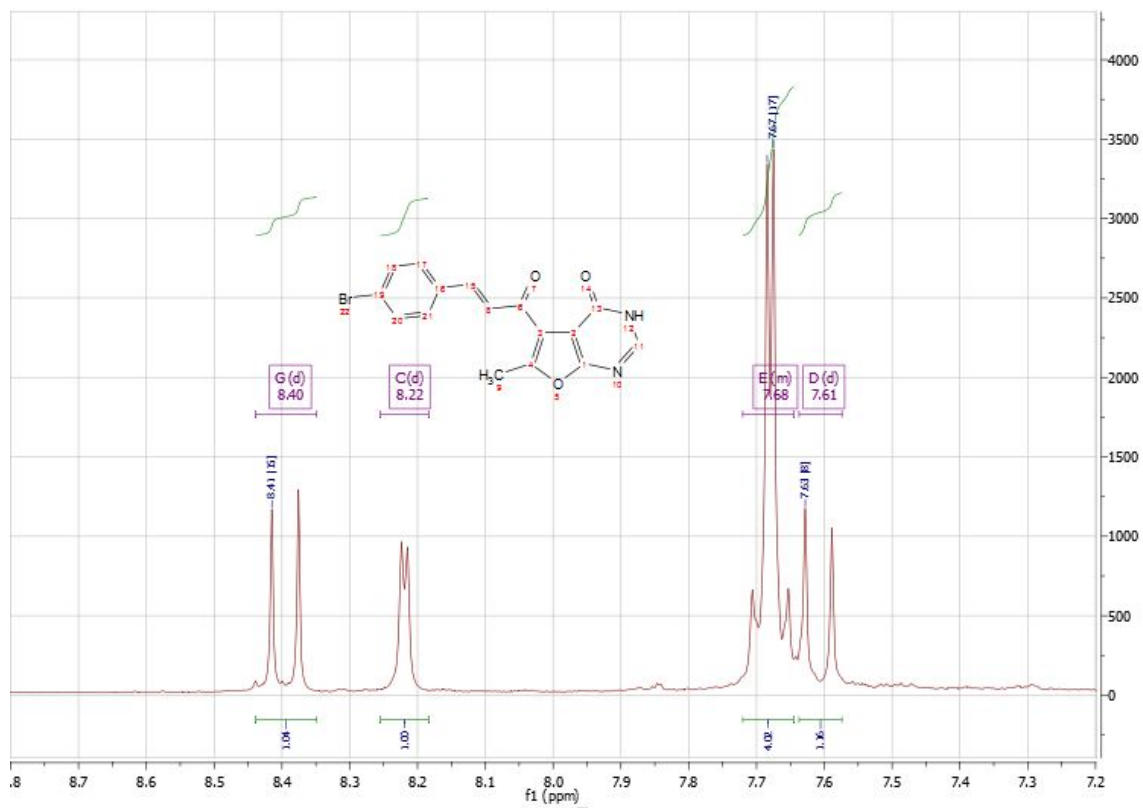

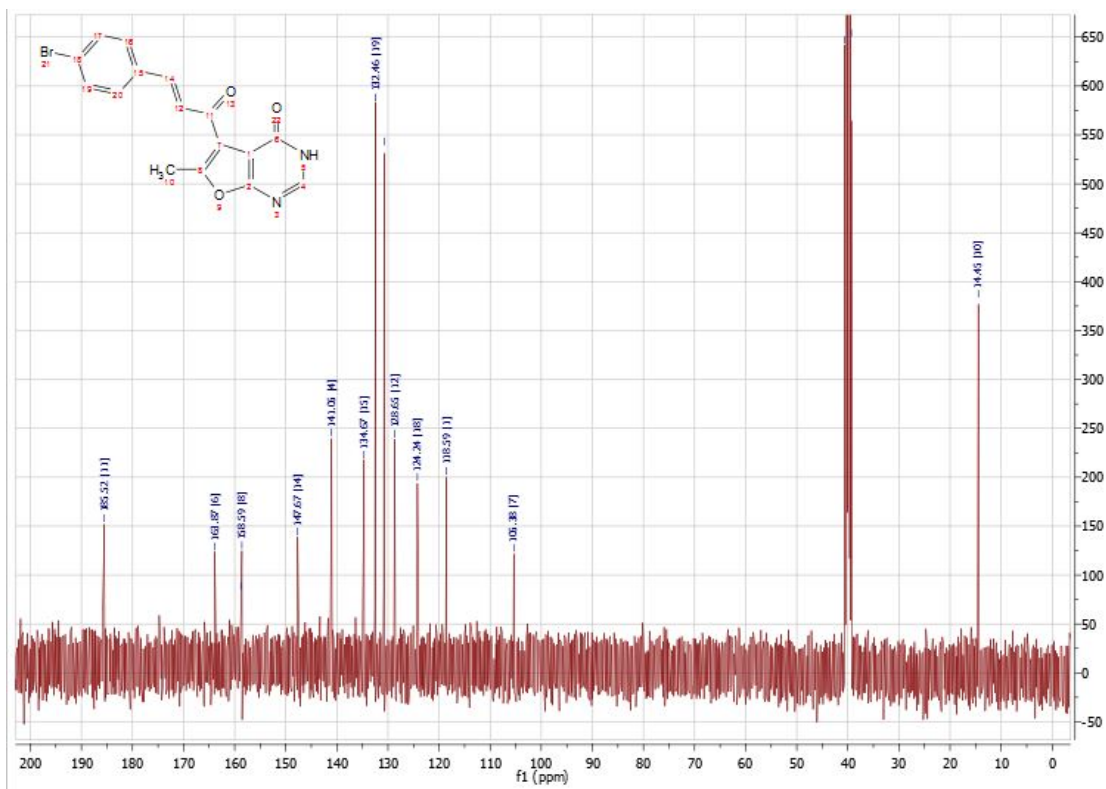

(E)-5-(3-(4-Nitrophenyl)acryloyl)-6-methylfuro[2,3-d]pyrimidin-4(3H)-one (5f)

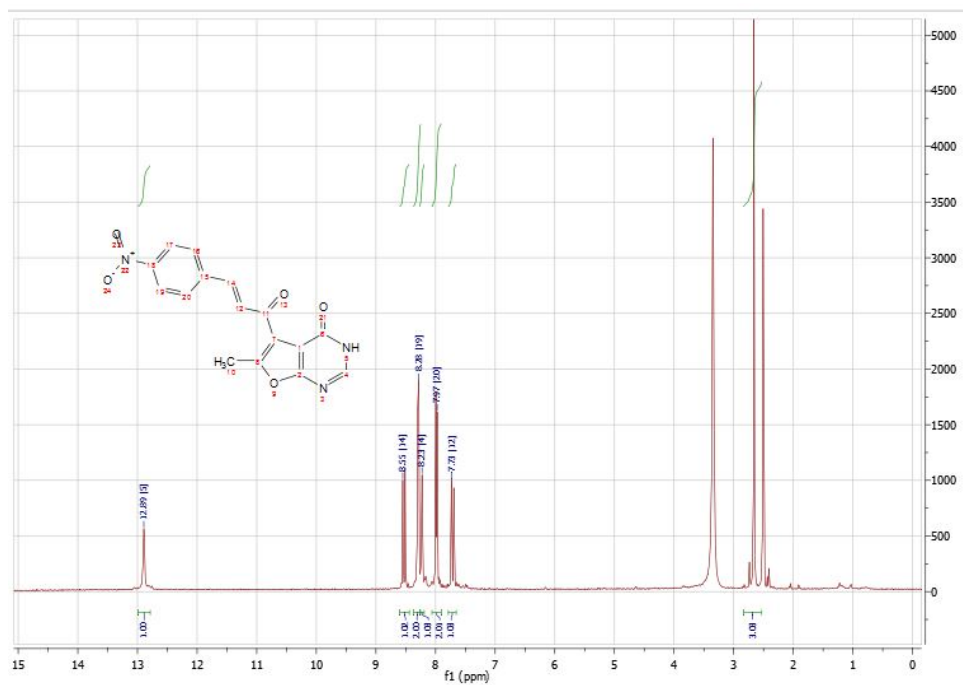

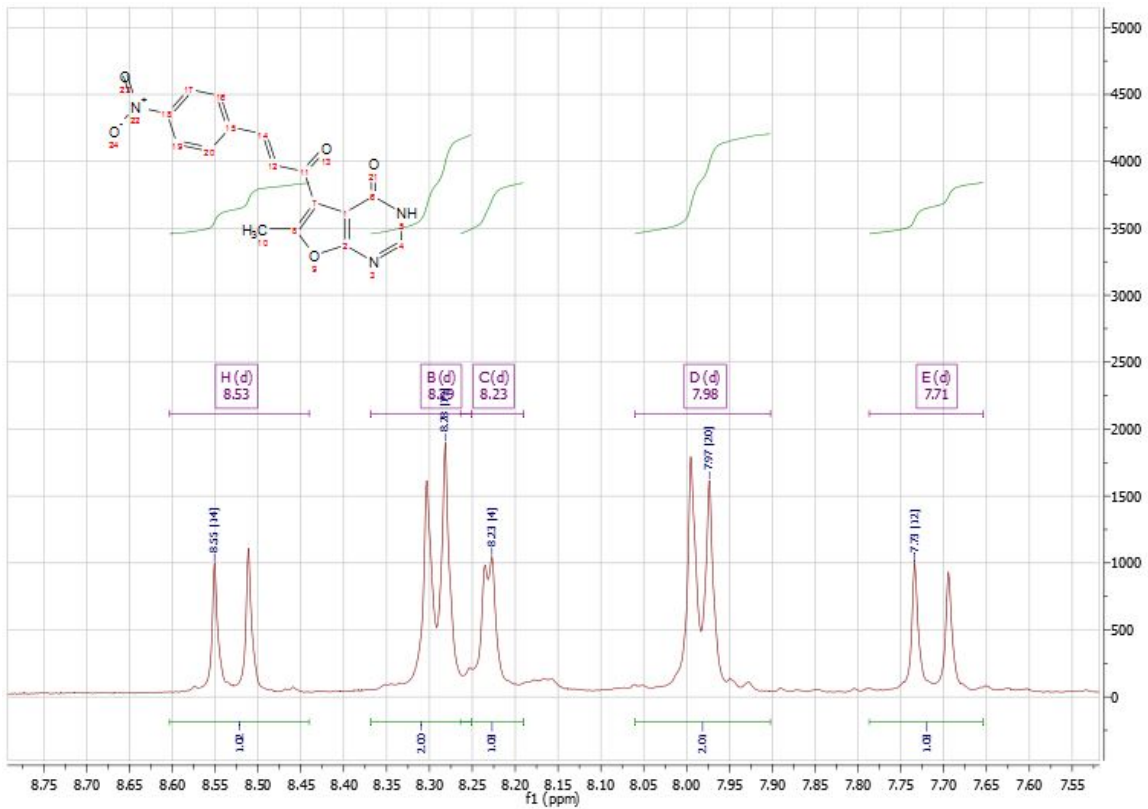

**(E)-5-(3-(4-(dimethylamino)phenyl)acryloyl)-6-methylfuro[2,3-d]pyrimidin-4(3H)-one (5g)**

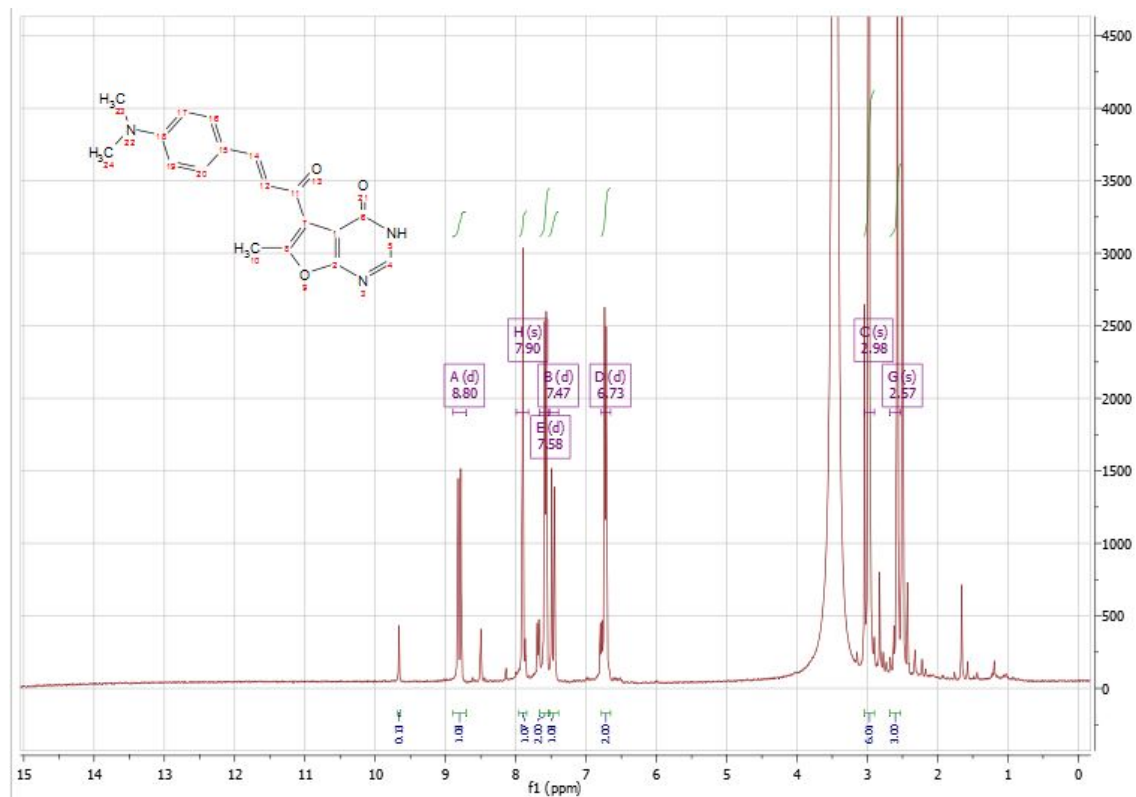



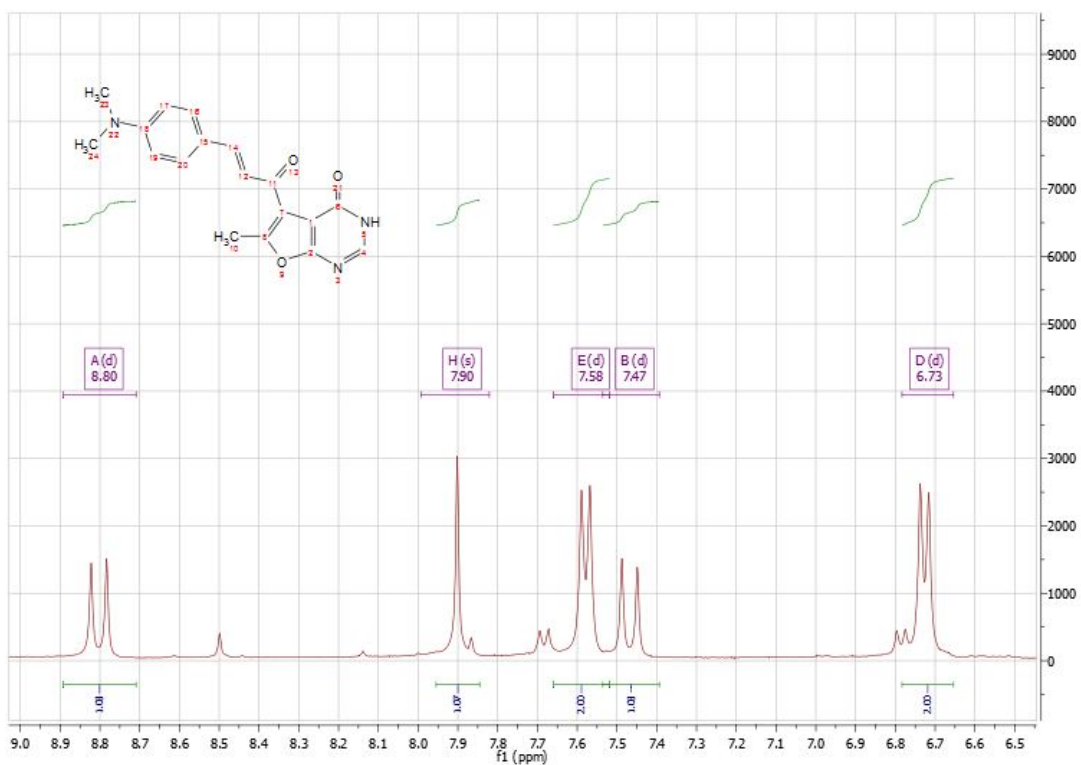

**(E)-5-(3-(2,4-dichlorophenyl)acryloyl)-6-methylfuro[2,3-d]pyrimidin-4(3H)-one (5h)**

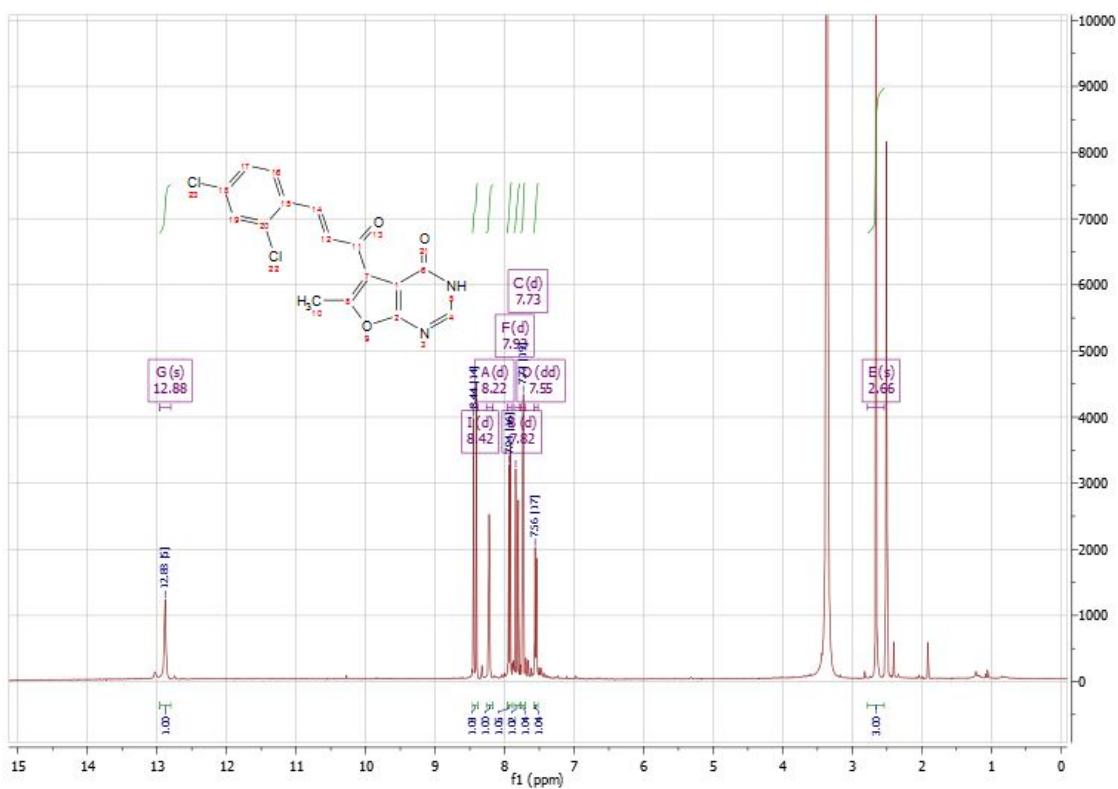

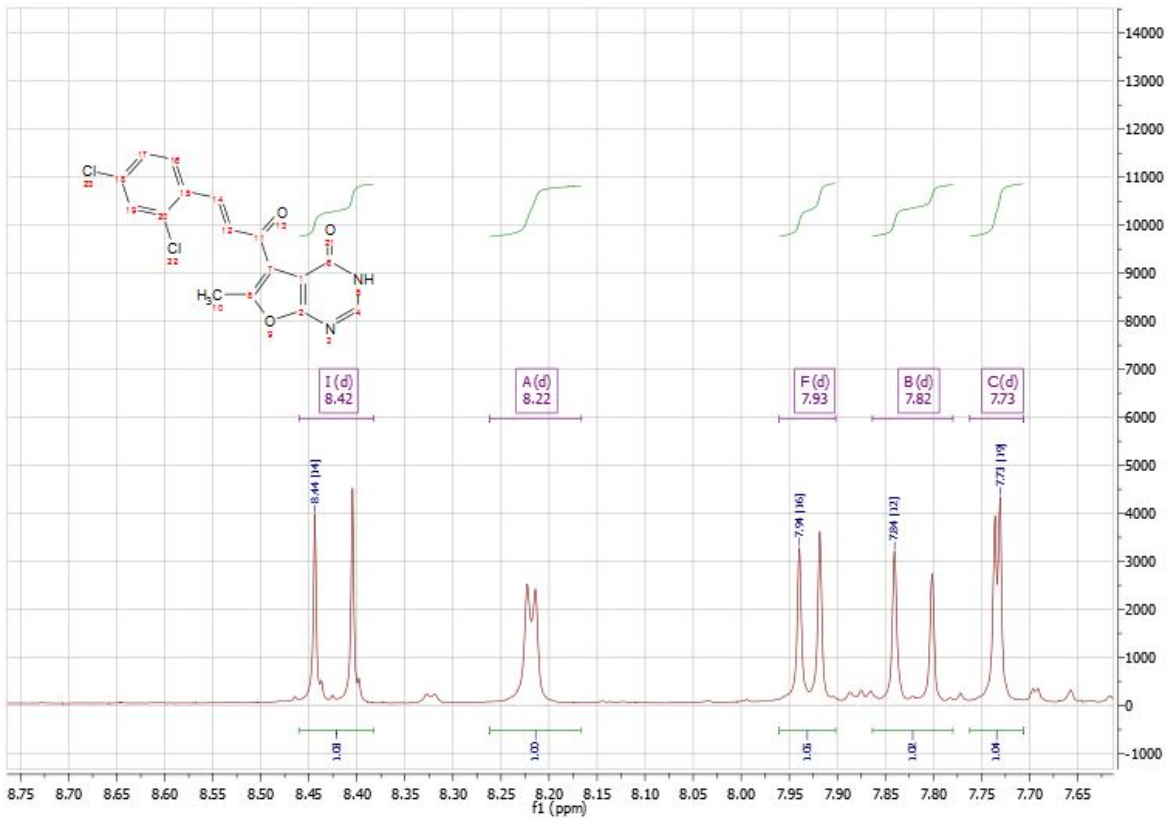

(E)-5-(3-(4-hydroxy-3-methoxyphenyl)acryloyl)-6-methylfuro[2,3-d]pyrimidin-4(3H)-one (5i)

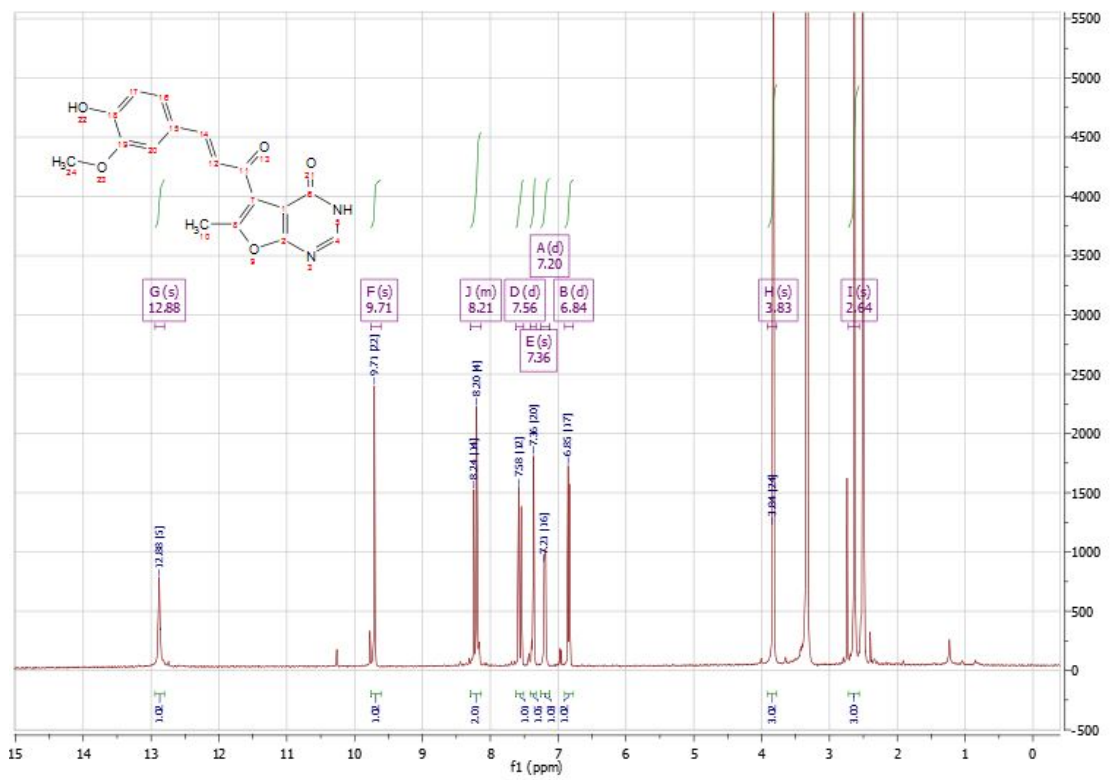

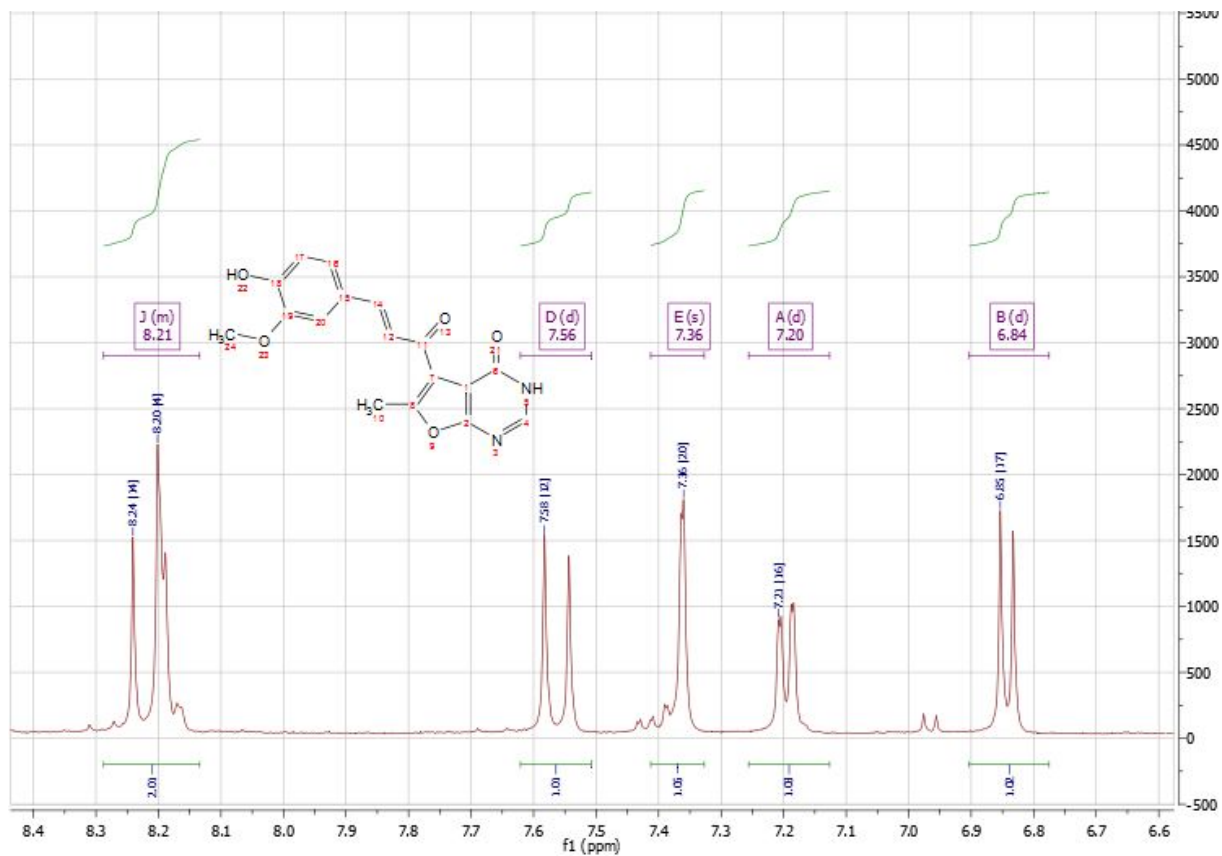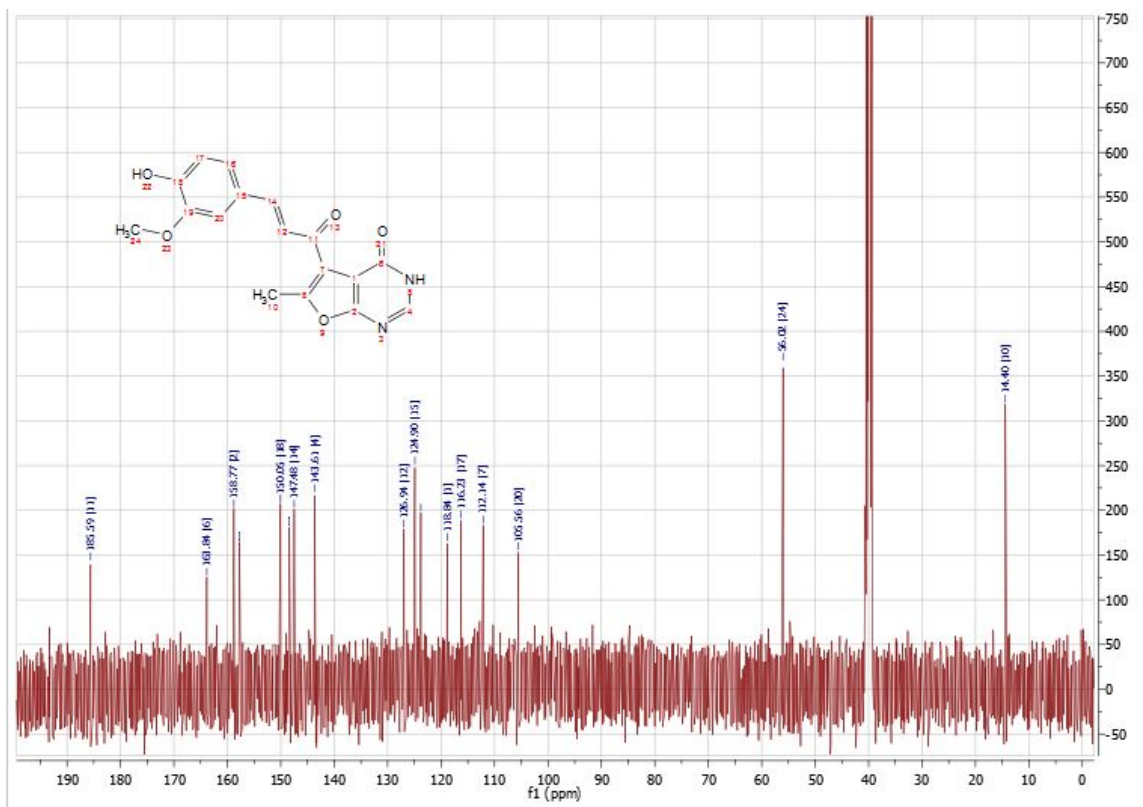

(E)-5-(3-(3,4-dimethoxyphenyl)acryloyl)-6-methylfuro[2,3-d]pyrimidin-4(3H)-one (5j)

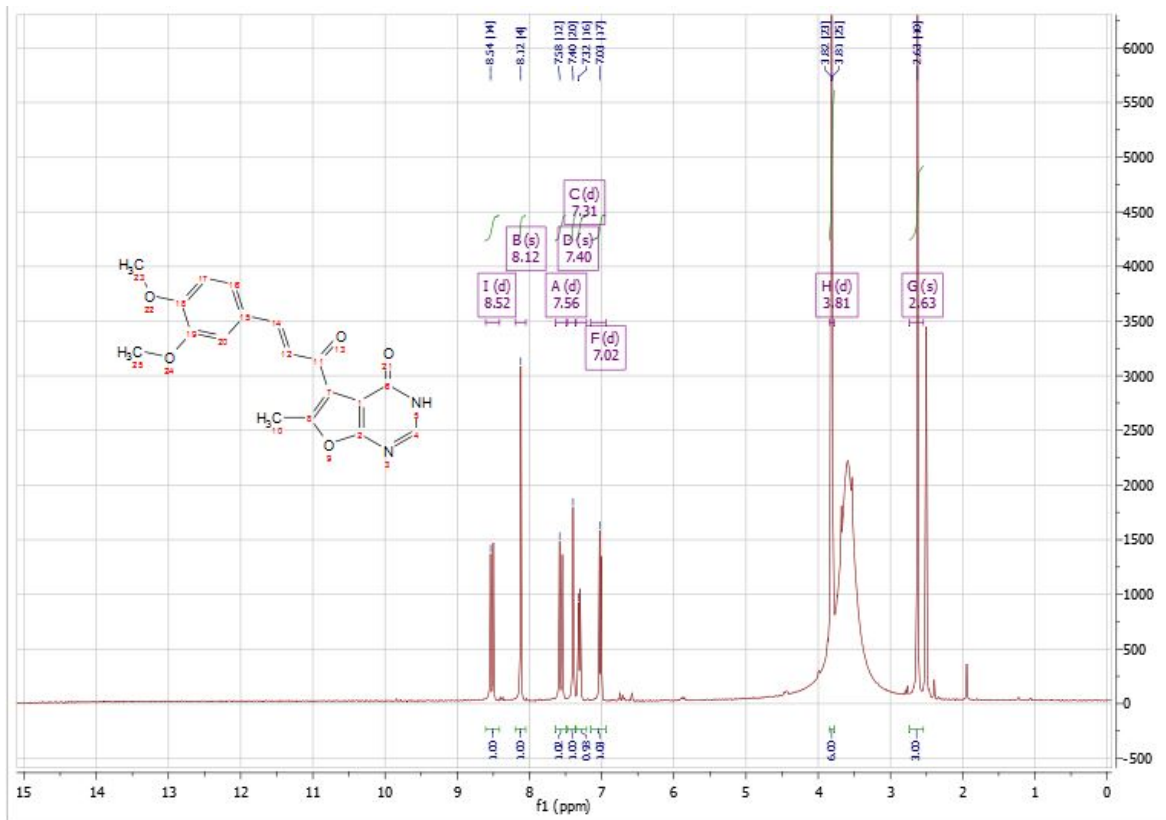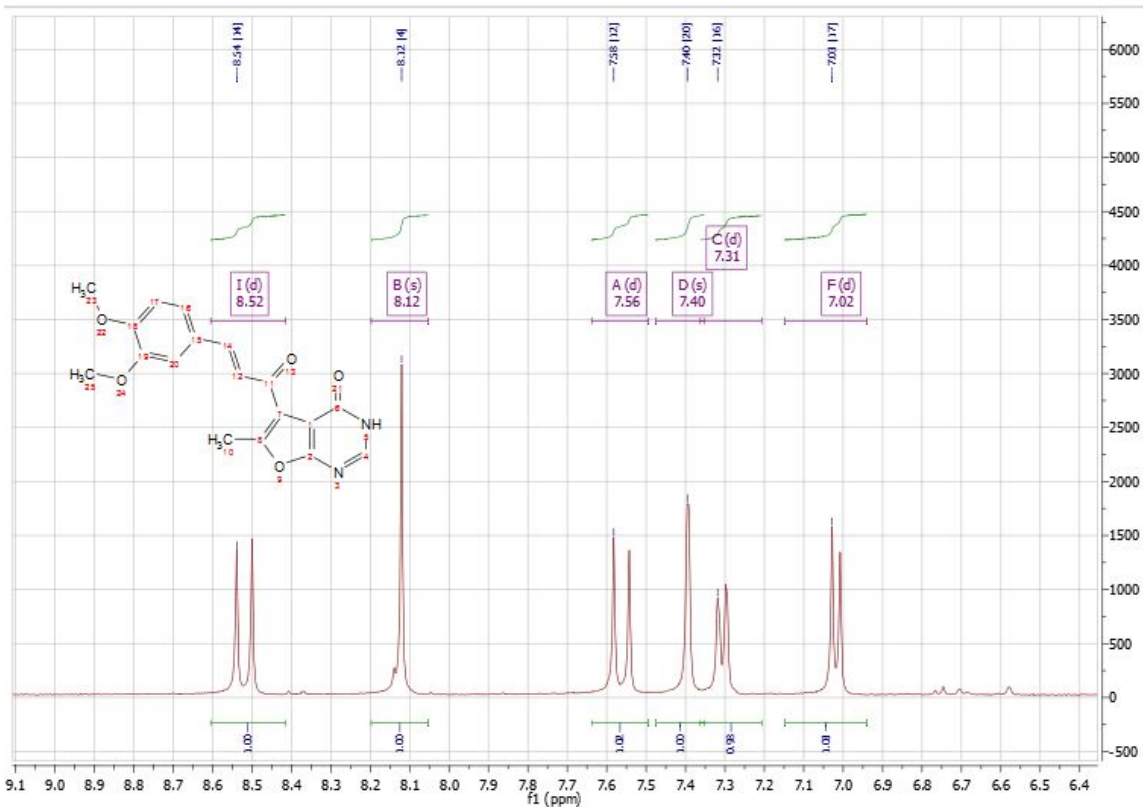

(E)-6-methyl-5-(3-(3,4,5-trimethoxyphenyl)acryloyl)furo[2,3-d]pyrimidin-4(3H)-one (5k)

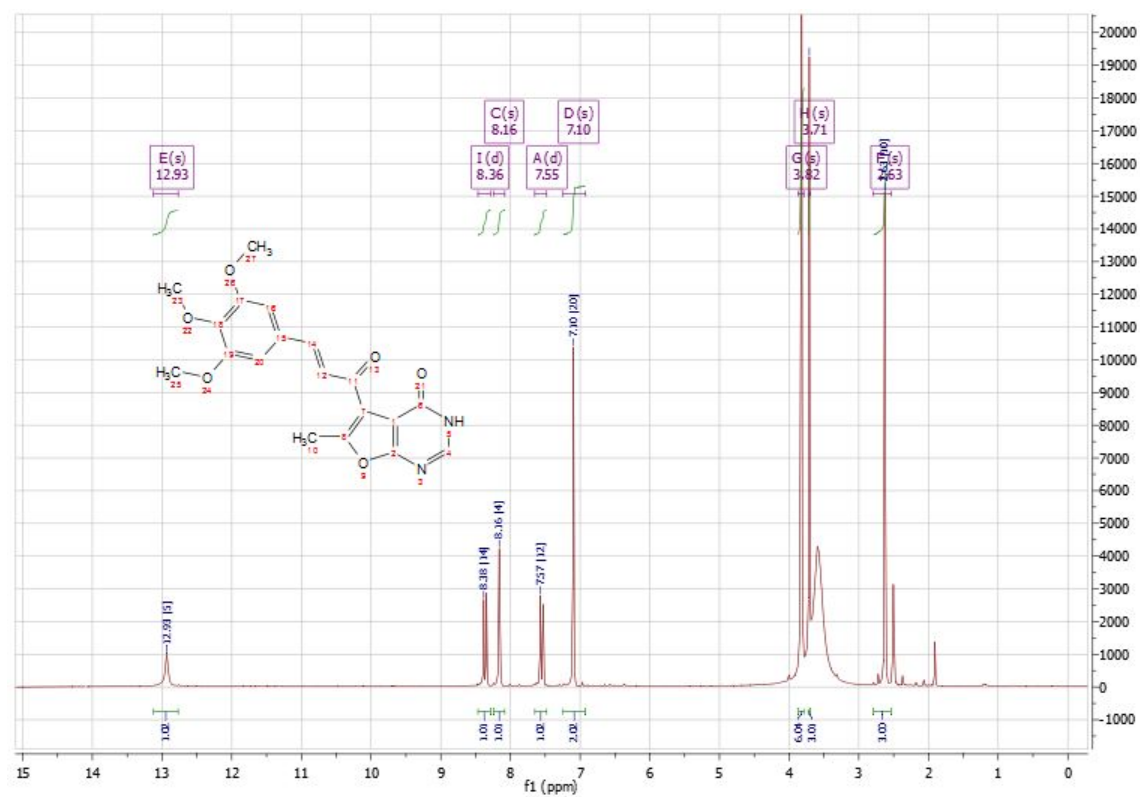

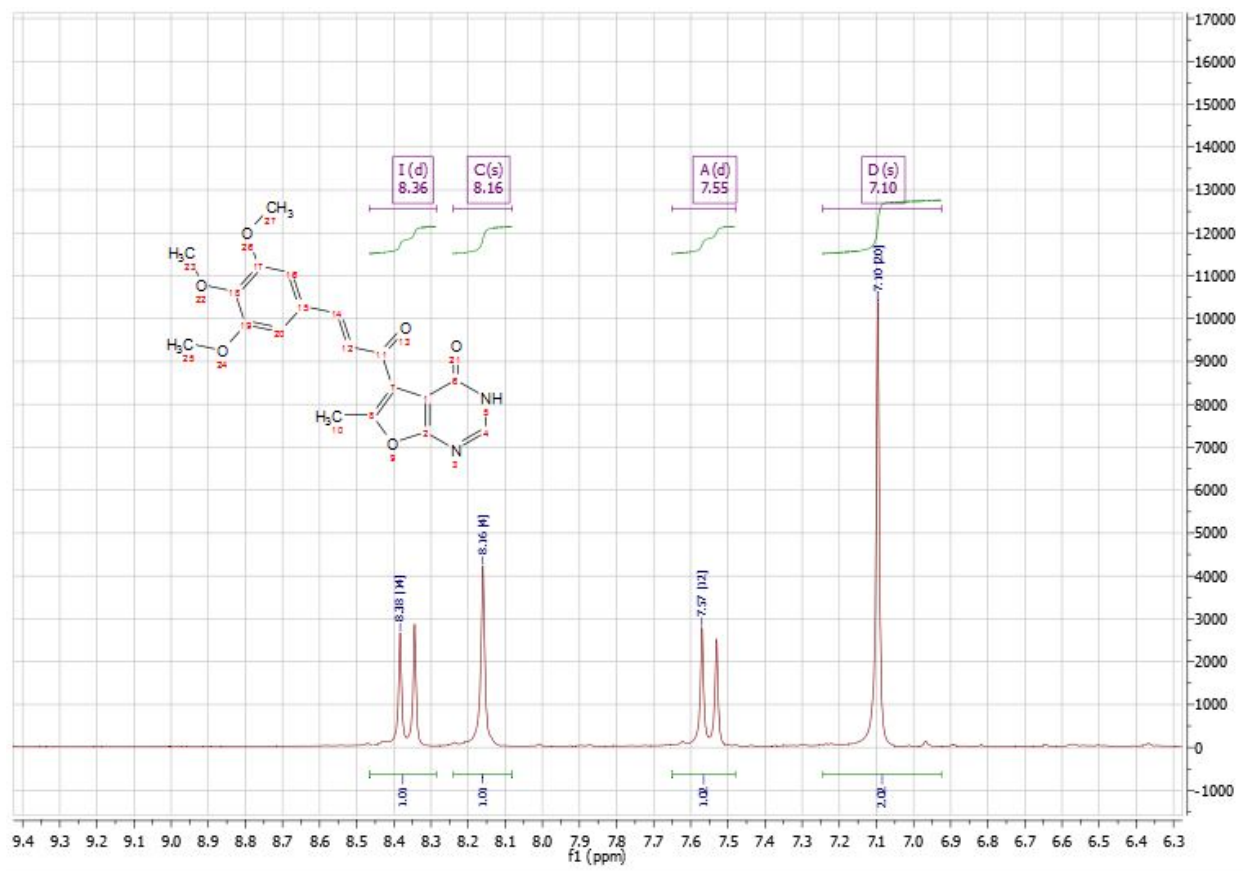

Supplement: RA-012-D2RA00889K-s001.pdf [file RA-012-D2RA00889K-s001.pdf]
